# Supplementary material
Source: PubMed Central journal article supplement (PMC2614677)
Supplement: NIHMS69914-supplement-1.pdf [file NIHMS69914-supplement-1.pdf]

## Supplementary Methods

*Microarray data preprocessing and differentially expressed genes selection:* After hybridization, the Illumina HumanWG-6 BeadChip was analyzed by the Gene Expression Module of BeadStudio Software (Illumina). Raw intensity and present/absent call of each probe was obtained for the 6 hybridized samples and exported in 1 comma-separated file. We used R [1] and BioConductor Lumi package [2] to examine the quality control information and perform pre-processing on the raw data. Variance stabilizing transformation (VST) and robust spline normalization (RSN) were applied on the raw data to generate normalized and comparable data among samples. After normalization, we used inverse VST to transform intensity data back to the raw scale before computing ratios between samples.

We performed statistical analysis to select differentially expressed genes between cell lines shCNTL and shHDAC3, using ratios to make comparisons. A ratio is derived by dividing the intensity of the test sample over the intensity of the control sample. Probes whose ratio is greater than 2 fold are considered up-regulated and probes whose ratio is less than 0.5 fold are considered down-regulated.

*Pattern-based Clustering:* We used Pattern-based Clustering as an approach to perform functional analysis by grouping genes with similar expression pattern into groups. Pattern-based Clustering uses non-numeric parameters assigned for each fold change pattern to group genes in order to avoid assigning pre-defined clustering number and common inconsistency problems in distance-based clustering algorithms such as K-means.

*Finding over-represented Gene Ontology (GO) terms:* Pattern-based Clustering generates patterns based on the input genes and their expression data. For some interesting patterns, we used R and GOstats package [3] to find over-represented Gene Ontology terms in Biological Process hierarchy. This functional analysis will find if certain GO Biological Processes are associated with a certain expression pattern. It may also find if certain genes in this cluster are involved together in an over-represented GO Biological Process.

Given a set of genes, GOstats performs functional analysis based on the association of Gene Ontology (GO) terms to genes. It uses a Hypergeometrical model to find over-represented GO terms for the given set of genes compared to the universe. We used BioConductor illuminaHumanv2 library as the universe as it matches with the Illumina chip used in this experiment. We tested two gene lists, genes upregulated by in shHD3 cells compared to shCNTL, and genes downregulated by shHD3 compared to shCNTL.

1. Ross Ihaka and Robert Gentleman. R: A language for data analysis and graphics. *Journal of Computational and Graphical Statistics*, 5(3):299-314, 1996.
2. Du P, Kibbe WA and Lin SM. lumi: a pipeline for processing Illumina microarray. *Bioinformatics*. 2008 May 8.
3. Falcon S, Gentleman R. Using GOstats to test gene lists for GO term association. *Bioinformatics*. 2007 Jan 15;23(2):257-8.

Supplemental Table 1: The following genes show at least a two-fold increase in expression in the shHD3 cell line compared to the shCNTL cell line.

| GENEID | SYMBOL   |        |          |        |           |
|--------|----------|--------|----------|--------|-----------|
|        |          | 9564   | BCAR1    | 7464   | CORO2A    |
|        |          | 55653  | BCAS4    | 23406  | COTL1     |
|        |          | 440603 | BCL2L15  | 1384   | CRAT      |
| 10157  | AASS     | 606    | BCL8     | 51232  | CRIM1     |
| 83451  | ABHD11   | 627    | BDNF     | 1396   | CRIP1     |
| 57406  | ABHD6    | 51272  | BET1L    | 10491  | CRTAP     |
| 79575  | ABHD8    | 8553   | BHLHB2   | 1437   | CSF2      |
| 32     | ACACB    | 644    | BLVRA    | 1465   | CSRP1     |
| 28976  | ACAD9    | 91653  | BOC      | 1469   | CST1      |
| 39     | ACAT2    | 26580  | BSCL2    | 1474   | CST6      |
| 48     | ACO1     | 682    | BSG      | 1490   | CTGF      |
| 10965  | ACOT2    | 121551 | BTBD11   | 115908 | CTHRC1    |
| 23597  | ACOT9    | 59285  | CACNG6   | 8727   | CTNNAL1   |
| 2180   | ACSL1    | 59285  | CACNG6   | 1499   | CTNNB1    |
| 2182   | ACSL4    | 23705  | CADM1    | 1509   | CTSD      |
| 84532  | ACSS1    | 199731 | CADM4    | 1514   | CTSL1     |
| 59     | ACTA2    | 8536   | CAMK1    | 1515   | CTSL2     |
| 71     | ACTG1    | 55450  | CAMK2N1  | 1522   | CTSZ      |
| 90     | ACVR1    | 10486  | CAP2     | 404093 | CUEDC1    |
| 91     | ACVR1B   | 726    | CAPN5    | 1525   | CXADR     |
| 11095  | ADAMT8   | 64170  | CARD9    | 58191  | CXCL16    |
| 133    | ADM      | 117144 | CATSPER1 | 80777  | CYB5B     |
| 147    | ADRA1B   | 874    | CBR3     | 51700  | CYB5R2    |
| 27125  | AFF4     | 11335  | CBX3     | 1535   | CYBA      |
| 375790 | AGRN     | 11335  | CBX3     | 54205  | CYCS      |
| 79026  | AHNAK    | 83643  | CCDC3    | 26999  | CYFIP2    |
| 9590   | AKAP12   | 892    | CCNC     | 1592   | CYP26A1   |
| 9590   | AKAP12   | 896    | CCND3    | 1593   | CYP27A1   |
| 80709  | AKNA     | 151195 | CCNYL1   | 1595   | CYP51A1   |
| 214    | ALCAM    | 908    | CCT6A    | 3491   | CYR61     |
| 220    | ALDH1A3  | 283316 | CD163L1  | 1601   | DAB2      |
| 56052  | ALG1     | 967    | CD63     | 1605   | DAG1      |
| 55849  | ALG13    | 970    | CD70     | 1611   | DAP       |
| 242    | ALOX12B  | 972    | CD74     | 79007  | DBNDD1    |
| 57679  | ALS2     | 975    | CD81     | 28988  | DBNL      |
| 154796 | AMOT     | 4267   | CD99     | 51473  | DCDC2     |
| 27063  | ANKRD1   | 978    | CDA      | 50807  | DDEF1     |
| 29123  | ANKRD11  | 991    | CDC20    | 55616  | DDEF1L1   |
| 302    | ANXA2    | 10602  | CDC42EP3 | 1649   | DDIT3     |
| 302    | ANXA2    | 148170 | CDC42EP5 | 57706  | DENND1A   |
| 305    | ANXA2P3  | 1001   | CDH3     | 51009  | DERL2     |
| 308    | ANXA5    | 1024   | CDK8     | 1606   | DGKA      |
| 1174   | AP1S1    | 1025   | CDK9     | 1718   | DHCR24    |
| 1174   | AP1S1    | 1040   | CDS1     | 1717   | DHCR7     |
| 8905   | AP1S2    | 634    | CEACAM1  | 10202  | DHRS2     |
| 27301  | APEX2    | 634    | CEACAM1  | 11083  | DIDO1     |
| 334    | APLP2    | 1048   | CEACAM5  | 84925  | DIRC2     |
| 9582   | APOBEC3B | 4680   | CEACAM6  | 22943  | DKK1      |
| 200316 | APOBEC3F | 1088   | CEACAM8  | 27122  | DKK3      |
| 60489  | APOBEC3G | 64411  | CENTD3   | 1742   | DLG4      |
| 348    | APOE     | 79959  | CEP76    | 65989  | DLK2      |
| 377    | ARF3     | 1675   | CFD      | 3300   | DNAJB2    |
| 378    | ARF4     | 51142  | CHCHD2   | 10049  | DNAJB6    |
| 9411   | ARHGAP29 | 51142  | CHCHD2   | 22845  | DOLK      |
| 23370  | ARHGEF18 | 27243  | CHMP2A   | 11072  | DUSP14    |
| 50650  | ARHGEF3  | 10370  | CITED2   | 1847   | DUSP5     |
| 84159  | ARID5B   | 1164   | CKS2     | 1848   | DUSP6     |
| 406    | ARNTL    | 23155  | CLCC1    | 140735 | DYNLL2    |
| 10552  | ARPC1A   | 137075 | CLDN23   | 83658  | DYNLRB1   |
| 10095  | ARPC1B   | 1366   | CLDN7    | 83658  | DYNLRB1   |
| 81873  | ARPC5L   | 25932  | CLIC4    | 10682  | EBP       |
| 432    | ASGR1    | 79745  | CLIP4    | 1902   | EDG2      |
| 253982 | ASPHD1   | 64084  | CLSTN2   | 1906   | EDN1      |
| 467    | ATF3     | 134147 | CMBL     | 1917   | EEF1A2    |
| 522    | ATP5J    | 146223 | CMTM4    | 30008  | EFEMP2    |
| 526    | ATP6V1B2 | 152189 | CMTM8    | 1949   | EFNB3     |
| 51382  | ATP6V1D  | 154043 | CNKSR3   | 1956   | EGFR      |
| 6310   | ATXN1    | 1265   | CNN2     | 1958   | EGR1      |
| 9212   | AURKB    | 1305   | COL13A1  | 10938  | EHD1      |
| 60370  | AVPI1    | 80781  | COL18A1  | 30844  | EHD4      |
| 64651  | AXUD1    | 1299   | COL9A3   | 27102  | EIF2AK1   |
| 2683   | B4GALT1  | 9276   | COPB2    | 1973   | EIF4A1    |
| 8702   | B4GALT4  | 10980  | COPS6    | 317649 | EIF4E3    |
| 11285  | B4GALT7  | 80219  | COQ10B   | 1983   | EIF5      |
| 9531   | BAG3     | 23603  | CORO1C   | 56648  | EIF5A2    |
| 55973  | BCAP29   |        |          |        |           |
|        |          |        |          | 114794 | ELFN2     |
|        |          |        |          | 2014   | EMP3      |
|        |          |        |          | 8507   | ENC1      |
|        |          |        |          | 9583   | ENTPD4    |
|        |          |        |          | 2034   | EPAS1     |
|        |          |        |          | 54749  | EPDR1     |
|        |          |        |          | 94240  | EPSTI1    |
|        |          |        |          | 54206  | ERRFI1    |
|        |          |        |          | 2109   | ETFB      |
|        |          |        |          | 2113   | ETS1      |
|        |          |        |          | 51010  | EXOSC3    |
|        |          |        |          | 51010  | EXOSC3    |
|        |          |        |          | 23086  | EXPH5     |
|        |          |        |          | 7430   | EZR       |
|        |          |        |          | 3992   | FADS1     |
|        |          |        |          | 3995   | FADS3     |
|        |          |        |          | 83641  | FAM107B   |
|        |          |        |          | 91523  | FAM113B   |
|        |          |        |          | 158293 | FAM120AOS |
|        |          |        |          | 116224 | FAM122A   |
|        |          |        |          | 116496 | FAM129A   |
|        |          |        |          | 116496 | FAM129A   |
|        |          |        |          | 64855  | FAM129B   |
|        |          |        |          | 81566  | FAM130A1  |
|        |          |        |          | 201158 | FAM18B2   |
|        |          |        |          | 56975  | FAM20C    |
|        |          |        |          | 51063  | FAM26B    |
|        |          |        |          | 131583 | FAM43A    |
|        |          |        |          | 404636 | FAM45A    |
|        |          |        |          | 115572 | FAM46B    |
|        |          |        |          | 54478  | FAM64A    |
|        |          |        |          | 79567  | FAM65A    |
|        |          |        |          | 81610  | FAM83D    |
|        |          |        |          | 137392 | FAM92A1   |
|        |          |        |          | 2189   | FANCG     |
|        |          |        |          | 22992  | FBXL11    |
|        |          |        |          | 84961  | FBXL20    |
|        |          |        |          | 26232  | FBXO2     |
|        |          |        |          | 9638   | FEZ1      |
|        |          |        |          | 9637   | FEZ2      |
|        |          |        |          | 2258   | FGF13     |
|        |          |        |          | 2280   | FKBP1A    |
|        |          |        |          | 64838  | FNDC4     |
|        |          |        |          | 2353   | FOS       |
|        |          |        |          | 2296   | FOXC1     |
|        |          |        |          | 2297   | FOXD1     |
|        |          |        |          | 55810  | FOXJ2     |
|        |          |        |          | 2495   | FTH1      |
|        |          |        |          | 2517   | FUCA1     |
|        |          |        |          | 79443  | FYCO1     |
|        |          |        |          | 2535   | FZD2      |
|        |          |        |          | 8324   | FZD7      |
|        |          |        |          | 23710  | GABARAPL1 |
|        |          |        |          | 4616   | GADD45B   |
|        |          |        |          | 10912  | GADD45G   |
|        |          |        |          | 2584   | GALK1     |
|        |          |        |          | 11226  | GALNT6    |
|        |          |        |          | 2593   | GAMT      |
|        |          |        |          | 2624   | GATA2     |
|        |          |        |          | 2635   | GBP3      |
|        |          |        |          | 2730   | GCLM      |
|        |          |        |          | 2700   | GJA3      |
|        |          |        |          | 2766   | GMPR      |
|        |          |        |          | 2767   | GNA11     |
|        |          |        |          | 2790   | GNG10     |
|        |          |        |          | 2790   | GNG10     |
|        |          |        |          | 2790   | GNG10     |
|        |          |        |          | 2791   | GNG11     |
|        |          |        |          | 51280  | GOLM1     |
|        |          |        |          | 9570   | GOSR2     |
|        |          |        |          | 2817   | GPC1      |
|        |          |        |          | 56834  | GPR137    |
|        |          |        |          | 7107   | GPR137B   |
|        |          |        |          | 283554 | GPR137C   |
|        |          |        |          | 27239  | GPR162    |

|        |            |        |          |        |         |        |          |
|--------|------------|--------|----------|--------|---------|--------|----------|
| 2874   | GPS2       | 547    | KIF1A    | 4240   | MFGE8   | 8974   | P4HA2    |
| 63940  | GPSM3      | 1316   | KLF6     | 84879  | MFSD2   | 11252  | PACSIN2  |
| 2878   | GPX3       | 687    | KLF9     | 8190   | MIA     | 51702  | PAD13    |
| 2934   | GSN        | 114818 | KLHL29   | 4276   | MICA    | 23022  | PALLD    |
| 404672 | GTF2H5     | 51088  | KLHL5    | 4277   | MICB    | 5064   | PALM     |
| 51454  | GULP1      | 5650   | KLK7     | 11043  | MID2    | 56666  | PANX2    |
| 8908   | GYG2       | 3838   | KPNA2    | 4286   | MITF    | 89932  | PAPLN    |
| 57493  | HEG1       | 3858   | KRT10    | 79083  | MLPH    | 5069   | PAPPA    |
| 55008  | HERC6      | 3860   | KRT13    | 4318   | MMP9    | 139135 | PASD1    |
| 84667  | HES7       | 3875   | KRT18    | 25843  | MOBKL3  | 219988 | PATL1    |
| 3074   | HEXB       | 25984  | KRT23    | 79710  | MORC4   | 10135  | PBEF1    |
| 55733  | HHAT       | 3885   | KRT34    | 56180  | MOSPD1  | 8850   | PCAF     |
| 84278  | HIATL2     | 390792 | KRT39    | 64398  | MPP5    | 27344  | PCSK1N   |
| 84278  | HIATL2     | 3887   | KRT81    | 6150   | MRPL23  | 5125   | PCSK5    |
| 3091   | HIF1A      | 81872  | KRTAP2-1 | 64975  | MRPL41  | 9124   | PDLIM1   |
| 84681  | HINT2      | 81872  | KRTAP2-1 | 740    | MRPL49  | 27295  | PDLIM3   |
| 3092   | HIP1       | 83896  | KRTAP3-1 | 253827 | MSRB3   | 81572  | PDRG1    |
| 3006   | HIST1H1C   | 8270   | LAGE3    | 4487   | MSX1    | 8682   | PEA15    |
| 3012   | HIST1H2AE  | 3920   | LAMP2    | 4489   | MT1A    | 5216   | PFN1     |
| 8336   | HIST1H2AM  | 3920   | LAMP2    | 4493   | MT1E    | 5223   | PGAM1    |
| 8347   | HIST1H2BC  | 27074  | LAMP3    | 4493   | MT1E    | 5223   | PGAM1    |
| 8344   | HIST1H2BE  | 10314  | LANCL1   | 4494   | MT1F    | 5230   | PGK1     |
| 85236  | HIST1H2BK  | 55323  | LARP6    | 4495   | MT1G    | 5236   | PGM1     |
| 8337   | HIST2H2AA3 | 91012  | LASS5    | 4500   | MT1L    | 5238   | PGM3     |
| 8349   | HIST2H2BE  | 26524  | LATS2    | 4501   | MT1X    | 79142  | PHF23    |
| 8370   | HIST2H4A   | 81606  | LBH      | 4502   | MT2A    | 23612  | PHLDA3   |
| 3105   | HLA-A      | 3934   | LCN2     | 4599   | MX1     | 90102  | PHLDB2   |
| 3145   | HMBS       | 10536  | LEPREL2  | 4606   | MYBPC2  | 29085  | PHPT1    |
| 3146   | HMGB1      | 54741  | LEPROT   | 26579  | MYEOV   | 5291   | PIK3CB   |
| 3157   | HMGCS1     | 137994 | LETM2    | 4628   | MYH10   | 5292   | PIMI     |
| 3190   | HNRPK      | 3958   | LGALS3   | 4637   | MYL6    | 65018  | PINK1    |
| 3203   | HOXA6      | 5641   | LGMN     | 4642   | MYO1D   | 26207  | PITPNC1  |
| 3212   | HOXB2      | 89884  | LHX4     | 127294 | MYOM3   | 7941   | PLA2G7   |
| 3224   | HOXC8      | 26468  | LHX6     | 162417 | NAGS    | 5327   | PLAT     |
| 3237   | HOXD11     | 51474  | LIMA1    | 54187  | NANS    | 5360   | PLTP     |
| 11145  | HRASLS3    | 22998  | LIMCH1   | 4676   | NAP1L4  | 5376   | PMP22    |
| 3269   | HRH1       | 3984   | LIMK1    | 8774   | NAPG    | 10687  | PNMA2    |
| 8739   | HRK        | 3987   | LIMS1    | 81565  | NDEL1   | 57104  | PNPLA2   |
| 3303   | HSPA1A     | 3987   | LIMS1    | 4693   | NDP     | 375775 | PNPLA7   |
| 26353  | HSPB8      | 3987   | LIMS1    | 55967  | NDUFA12 | 5430   | POLR2A   |
| 3384   | ICAM2      | 3987   | LIMS1    | 4702   | NDUFA8  | 5439   | POLR2J   |
| 3398   | ID2        | 96626  | LIMS3    | 10529  | NEBL    | 5441   | POLR2L   |
| 3417   | IDH1       | 96626  | LIMS3    | 26012  | NELF    | 51371  | POMP     |
| 3422   | IDI1       | 9388   | LIPG     | 9603   | NFE2L3  | 8496   | PPFIBP1  |
| 3423   | IDS        | 9516   | LITAF    | 4781   | NFIB    | 5480   | PPIC     |
| 3423   | IDS        | 4005   | LMO2     | 4781   | NFIB    | 5493   | PPL      |
| 8870   | IER3       | 114783 | LMTK3    | 4784   | NFIX    | 152926 | PPMIK    |
| 51278  | IER5       | 84171  | LOXL4    | 4814   | NINJ1   | 54704  | PPM2C    |
| 3430   | IFI35      | 23175  | LPIN1    | 28512  | NKIRAS1 | 51400  | PPME1    |
| 8519   | IFITM1     | 115399 | LRRC56   | 4824   | NKX3-1  | 5499   | PPP1CA   |
| 10410  | IFITM3     | 22949  | LTB4DH   | 51701  | NLK     | 81706  | PPP1R14C |
| 3475   | IFRD1      | 4053   | LTBP2    | 9397   | NMT2    | 23645  | PPP1R15A |
| 3597   | IL13RA1    | 7798   | LUZP1    | 54433  | NOLA1   | 130814 | PQLC3    |
| 11009  | IL24       | 4061   | LY6E     | 4864   | NPC1    | 5547   | PRCP     |
| 3638   | INSIG1     | 4066   | LYL1     | 10577  | NPC2    | 25824  | PRDX5    |
| 3638   | INSIG1     | 57226  | LYRM2    | 4885   | NPTX2   | 144165 | PRICKLE1 |
| 10788  | IQGAP2     | 11178  | LZTS1    | 1728   | NQO1    | 5558   | PRIM2    |
| 3659   | IRF1       | 10226  | M6PRBP1  | 4835   | NQO2    | 51422  | PRKAG2   |
| 3665   | IRF7       | 23499  | MACF1    | 7025   | NR2F1   | 5583   | PRKCH    |
| 79191  | IRX3       | 9935   | MAFB     | 4900   | NRGN    | 10544  | PROCR    |
| 122961 | ISCA2      | 114569 | MAL2     | 56675  | NRIP3   | 9128   | PRPF4    |
| 9636   | ISG15      | 256691 | MAMDC2   | 51559  | NT5DC3  | 54458  | PRR13    |
| 3675   | ITGA3      | 4128   | MAOA     | 4907   | NT5E    | 54458  | PRR13    |
| 3682   | ITGAE      | 9020   | MAP3K14  | 4908   | NTF3    | 51450  | PRRX2    |
| 3685   | ITGAV      | 5601   | MAPK9    | 9891   | NUAK1   | 11098  | PRSS23   |
| 3706   | ITPKA      | 79109  | MAPKAP1  | 4521   | NUDT1   | 9265   | PSCD3    |
| 3710   | ITPR3      | 57574  | MAR4     | 64359  | NXN     | 5680   | PSG11    |
| 221895 | JAZF1      | 4082   | MARCKS   | 4939   | OAS2    | 5670   | PSG2     |
| 57158  | JPH2       | 90411  | MCFD2    | 64859  | OBFC2A  | 5672   | PSG4     |
| 3764   | KCNJ8      | 4199   | ME1      | 4957   | ODF2    | 11168  | PSIP1    |
| 3775   | KCNK1      | 10025  | MED16    | 169611 | OLFML2A | 5682   | PSMA1    |
| 3785   | KCNQ2      | 219541 | MED19    | 4973   | OLR1    | 5688   | PSMA7    |
| 65987  | KCTD14     | 9442   | MED27    | 220064 | ORAOV1  | 5694   | PSMB6    |
| 11014  | KDEL2      | 4212   | MEIS2    | 29948  | OSGIN1  | 5696   | PSMB8    |
| 10656  | KHDRBS3    | 9833   | MELK     | 26578  | OSTF1   | 5696   | PSMB8    |

|        |         |        |            |        |           |        |         |
|--------|---------|--------|------------|--------|-----------|--------|---------|
| 5700   | PSMC1   | 6307   | SC4MOL     | 8676   | STX11     | 27075  | TSPAN13 |
| 5700   | PSMC1   | 6341   | SCO1       | 6809   | STX3      | 26262  | TSPAN17 |
| 5700   | PSMC1   | 9805   | SCRN1      | 6836   | SURF4     | 7106   | TSPAN4  |
| 5700   | PSMC1   | 6385   | SDC4       | 64420  | SUSD1     | 7846   | TUBA1A  |
| 5701   | PSMC2   | 10807  | SDDCAG3    | 55061  | SUSD4     | 10376  | TUBA1B  |
| 9861   | PSMD6   | 113675 | SDSL       | 51111  | SUV420H1  | 7280   | TUBB2A  |
| 5721   | PSME2   | 23480  | SEC61G     | 6840   | SVIL      | 7280   | TUBB2A  |
| 5732   | PTGER2  | 8293   | SERF1A     | 57586  | SYT13     | 7280   | TUBB2A  |
| 113091 | PTH2    | 5265   | SERPINA1   | 94121  | SYTL4     | 347733 | TUBB2B  |
| 9200   | PTPLA   | 5054   | SERPINE1   | 6890   | TAP1      | 84617  | TUBB6   |
| 5770   | PTPN1   | 871    | SERPINH1   | 6892   | TAPBP     | 57045  | TWSG1   |
| 5771   | PTPN2   | 6431   | SFRS6      | 8887   | TAX1BP1   | 7295   | TXN     |
| 284119 | PTRF    | 23677  | SH3BP4     | 55357  | TBC1D2    | 51271  | UBAP1   |
| 138428 | PTRH1   | 6456   | SH3GL2     | 23102  | TBC1D2B   | 55833  | UBAP2   |
| 25945  | PVRL3   | 30011  | SH3KBP1    | 6926   | TBX3      | 84959  | UBASH3B |
| 29108  | PYCARD  | 153769 | SH3RF2     | 6919   | TCEA2     | 7314   | UBB     |
| 25797  | QPCT    | 6470   | SHMT1      | 85012  | TCEAL3    | 80019  | UBTD1   |
| 23475  | QPRT    | 6470   | SHMT1      | 23424  | TDRD7     | 23197  | UBXD8   |
| 25837  | RAB26   | 54414  | SIAE       | 8463   | TEAD2     | 7345   | UCHL1   |
| 11031  | RAB31   | 26037  | SIPA1L1    | 7016   | TESK1     | 7357   | UGCG    |
| 5865   | RAB3B   | 57568  | SIPA1L2    | 7022   | TFAP2C    | 90249  | UNC5A   |
| 5879   | RAC1    | 8935   | SKAP2      | 7041   | TGFB111   | 7378   | UPP1    |
| 5880   | RAC2    | 26503  | SLC17A5    | 7052   | TGM2      | 10090  | UST     |
| 5887   | RAD23B  | 6507   | SLC1A3     | 7052   | TGM2      | 9724   | UTP14C  |
| 5891   | RAGE    | 55186  | SLC25A36   | 7057   | THBS1     | 7421   | VDR     |
| 2889   | RAPGEF1 | 5172   | SLC26A4    | 84321  | THOC3     | 7425   | VGf     |
| 10411  | RAPGEF3 | 222962 | SLC29A4    | 7074   | TIAM1     | 7433   | VIPR1   |
| 51655  | RASD1   | 6513   | SLC2A1     | 7077   | TIMP2     | 57617  | VPS18   |
| 25780  | RASGRP3 | 81031  | SLC2A10    | 7082   | TJP1      | 137492 | VPS37A  |
| 11186  | RASSF1  | 154091 | SLC2A12    | 7088   | TLE1      | 155382 | VPS37D  |
| 92400  | RBM18   | 6515   | SLC2A3     | 7108   | TM7SF2    | 284415 | VSTM1   |
| 5936   | RBM4    | 6515   | SLC2A3     | 84314  | TMEM107   | 7450   | VWF     |
| 5939   | RBM52   | 6515   | SLC2A3     | 57146  | TMEM159   | 8976   | WASL    |
| 116362 | RBP7    | 11182  | SLC2A6     | 84141  | TMEM166   | 51186  | WBP5    |
| 348093 | RBPM52  | 29988  | SLC2A8     | 196527 | TMEM16F   | 282809 | WDR51B  |
| 54542  | RC3H2   | 7780   | SLC30A2    | 374395 | TMEM179B  | 10406  | WFDC2   |
| 5962   | RDX     | 347734 | SLC35B2    | 55076  | TMEM45A   | 8838   | WISP3   |
| 9185   | REPS2   | 84102  | SLC41A2    | 120224 | TMEM45B   | 7474   | WNT5A   |
| 5982   | RFC2    | 124935 | SLC43A2    | 55092  | TMEM51    | 7475   | WNT6    |
| 9827   | RGP1    | 57153  | SLC44A2    | 113452 | TMEM54    | 126374 | WTIP    |
| 8787   | RGS9    | 6508   | SLC4A3     | 26022  | TMEM98    | 23286  | WWC1    |
| 57414  | RHBDD2  | 6526   | SLC5A3     | 56937  | TMEPAI    | 7508   | XPC     |
| 64285  | RHBDF1  | 9056   | SLC7A7     | 56937  | TMEPAI    | 7525   | YES1    |
| 6009   | RHEB    | 23428  | SLC7A8     | 259236 | TMIE      | 7529   | YWHAB   |
| 388    | RHOB    | 6578   | SLCO2A1    | 7126   | TNFAIP1   | 7532   | YWHAG   |
| 389    | RHOC    | 6594   | SMARCA1    | 7127   | TNFAIP2   | 79413  | ZBED2   |
| 23433  | RHOQ    | 6604   | SMARCD3    | 51330  | TNFRSF12A | 79683  | ZDHHC14 |
| 23433  | RHOQ    | 6609   | SMPD1      | 8743   | TNFSF10   | 677    | ZFP36L1 |
| 60626  | RIC8A   | 23583  | SMUG1      | 7137   | TNNI3     | 23414  | ZFPM2   |
| 8780   | RIOK3   | 692084 | SNORD13    | 146691 | TOM1L2    | 79038  | ZFYVE21 |
| 8737   | RIPK1   | 6627   | SNRPA1     | 146691 | TOM1L2    | 7586   | ZKSCAN1 |
| 6017   | RLBP1   | 6631   | SNRPC      | 10953  | TOMM34    | 9205   | ZMYM5   |
| 390    | RND3    | 29887  | SNX10      | 94241  | TP53INP1  | 10771  | ZMYND11 |
| 54476  | RNF216  | 28966  | SNX24      | 58476  | TP53INP2  | 84225  | ZMYND15 |
| 54476  | RNF216  | 401548 | SNX30      | 7162   | TPBG      | 7696   | ZNF137  |
| 4920   | ROR2    | 54345  | SOX18      | 7168   | TPM1      | 7568   | ZNF20   |
| 6209   | RPS15   | 53340  | SPA17      | 8460   | TPST1     | 7551   | ZNF3    |
| 6231   | RPS26   | 6676   | SPAG4      | 7186   | TRAF2     | 282890 | ZNF311  |
| 6237   | RRAS    | 9789   | SPCS2      | 9697   | TRAM2     | 57567  | ZNF319  |
| 22800  | RRAS2   | 8878   | SQSTM1     | 10475  | TRIM38    | 22891  | ZNF365  |
| 83597  | RTP3    | 6727   | SRP14      | 7205   | TRIP6     | 163059 | ZNF433  |
| 112611 | RWDD2A  | 6733   | SRPK2      | 7220   | TRPC1     | 51710  | ZNF44   |
| 23429  | RYBP    | 54434  | SSH1       | 51393  | TRPV2     | 58499  | ZNF462  |
| 57167  | SALL4   | 30815  | ST6GALNAC6 | 59341  | TRPV4     | 57573  | ZNF471  |
| 23034  | SAMD4A  | 55620  | STAP2      | 8848   | TSC22D1   | 57711  | ZNF529  |
| 79685  | SAP30L  | 6773   | STAT2      | 1831   | TSC22D3   | 339559 | ZNF642  |
| 112483 | SAT2    | 6778   | STAT6      | 81628  | TSC22D4   | 57169  | ZNFX1   |
| 51119  | SBDS    | 6780   | STAU1      | 128553 | TSHZ2     | 10467  | ZNHIT1  |
| 51119  | SBDS    | 56977  | STOX2      | 57616  | TSHZ3     |        |         |

Supplemental Table 2: The following genes show at least a two-fold decrease in expression in the shHD3 cell line compared to the shCNTL cell line.

| GENEID | SYMBOL   |        |          |        |          |
|--------|----------|--------|----------|--------|----------|
|        |          | 10384  | BTN3A3   | 114788 | CSMD3    |
|        |          | 28969  | BZW2     | 1459   | CSNK2A2  |
| 29974  | A1CF     | 765    | CA6      | 1473   | CST5     |
| 21     | ABCA3    | 768    | CA9      | 8530   | CST7     |
| 5243   | ABCB1    | 81617  | CAB39L   | 1075   | CTSC     |
| 23456  | ABCB10   | 56997  | CABC1    | 8451   | CUL4A    |
| 22     | ABCB7    | 57010  | CABP4    | 51076  | CUTC     |
| 9619   | ABCG1    | 775    | CACNA1C  | 6372   | CXCL6    |
| 84448  | ABLM2    | 93589  | CACNA2D4 | 1528   | CYB5A    |
| 22885  | ABLM3    | 790    | CAD      | 1571   | CYP2E1   |
| 52     | ACPI     | 93664  | CADPS2   | 1573   | CYP2J2   |
| 71     | ACTG1    | 797    | CALCB    | 4051   | CYP4F3   |
| 81     | ACTN4    | 91860  | CALML4   | 1602   | DACH1    |
| 203102 | ADAM32   | 79012  | CAMKV    | 168002 | DACT2    |
| 171019 | ADAMTS19 | 823    | CAPN1    | 1621   | DBH      |
| 9719   | ADAMTSL2 | 79587  | CARS2    | 167227 | DCP2     |
| 55256  | ADI1     | 84733  | CBX2     | 79016  | DDA1     |
| 84890  | ADO      | 8535   | CBX4     | 1652   | DDT      |
| 158    | ADSL     | 57639  | CCDC146  | 1653   | DDX1     |
| 159    | ADSS     | 84318  | CCDC77   | 10212  | DDX39    |
| 122622 | ADSSL1   | 55704  | CCDC88A  | 1666   | DECR1    |
| 84632  | AFAP1L2  | 84142  | CCDC98   | 1670   | DEFA5    |
| 55326  | AGPAT5   | 8900   | CCNA1    | 1677   | DFFB     |
| 25909  | AHCTF1   | 57820  | CCNB1IP1 | 1725   | DHPS     |
| 54806  | AHI1     | 894    | CCND2    | 27121  | DKK4     |
| 130872 | AHSA2    | 7203   | CT3      | 10301  | DLEU1    |
| 150209 | AIFM3    | 4179   | CD46     | 10683  | DLL3     |
| 10270  | AKAP8    | 961    | CD47     | 1747   | DLX3     |
| 8644   | AKR1C3   | 968    | CD68     | 25981  | DNAH1    |
| 213    | ALB      | 8881   | CD16     | 8632   | DNAH17   |
| 8854   | ALDH1A2  | 8317   | CDC7     | 56521  | DNAJC12  |
| 217    | ALDH2    | 1009   | CDH11    | 56521  | DNAJC12  |
| 121642 | ALKBH2   | 1010   | CDH12    | 285126 | DNAJC5G  |
| 84266  | ALKBH7   | 1012   | CDH13    | 57572  | DOCK6    |
| 150864 | ALS2CR13 | 1015   | CDH17    | 1800   | DPEP1    |
| 55608  | ANKRD10  | 1021   | CDK6     | 1803   | DPP4     |
| 157567 | ANKRD46  | 4680   | CEACAM6  | 1809   | DPYSL3   |
| 84168  | ANTXR1   | 1054   | CEBPG    | 51514  | DTL      |
| 118429 | ANTXR2   | 27440  | CECR5    | 1846   | DUSP4    |
| 301    | ANXA1    | 11033  | CENTA1   | 54808  | DYM      |
| 307    | ANXA4    | 9702   | CEP57    | 8798   | DYRK4    |
| 341    | APOC1    | 64781  | CERK     | 144455 | E2F7     |
| 344    | APOC2    | 84952  | CGNL1    | 1880   | EBI2     |
| 55082  | ARGLU1   | 10669  | CGREF1   | 1891   | ECH1     |
| 9938   | ARHGAP25 | 9557   | CHD1L    | 51295  | ECSIT    |
| 27237  | ARHGEF16 | 80205  | CHD9     | 10913  | EDAR     |
| 9181   | ARHGEF2  | 1122   | CHML     | 9170   | EDG4     |
| 8874   | ARHGEF7  | 1124   | CHN2     | 80820  | EPDP1    |
| 10124  | ARL4A    | 140578 | CHODL    | 1948   | EFNB2    |
| 64801  | ARV1     | 1131   | CHRM3    | 1959   | EGR2     |
| 259266 | ASPM     | 55847  | CISD1    | 23301  | EHBP1    |
| 79058  | ASPSR1   | 9076   | CLDN1    | 83939  | EIF2A    |
| 79058  | ASPSR1   | 5010   | CLDN11   | 27161  | EIF2C2   |
| 445    | ASS1     | 125875 | CLDND2   | 1968   | EIF2S3   |
| 22809  | ATF5     | 6320   | CLEC11A  | 8664   | EIF3D    |
| 55101  | ATP5SL   | 1195   | CLK1     | 51386  | EIF3EIP  |
| 50617  | ATP6V0A4 | 119467 | CLRN3    | 8666   | EIF3G    |
| 57198  | ATP8B2   | 171425 | CLYBL    | 8667   | EIF3H    |
| 374868 | ATP9B    | 1266   | CNN3     | 27335  | EIF3K    |
| 10331  | B3GNT3   | 1690   | COCH     | 1994   | ELAVL1   |
| 8703   | B4GALT3  | 22796  | COG2     | 1999   | ELF3     |
| 80115  | BAIAP2L2 | 1307   | COL16A1  | 55250  | ELP2     |
| 29994  | BAZZB    | 1282   | COL4A1   | 30817  | EMR2     |
| 590    | BCHE     | 1291   | COL6A1   | 2027   | ENO3     |
| 53335  | BCL11A   | 1294   | COL7A1   | 22875  | ENPP4    |
| 64919  | BCL11B   | 170622 | COMMD6   | 2051   | EPHB6    |
| 632    | BGLAP    | 1312   | COMT     | 2053   | EPHX2    |
| 274    | BIN1     | 64708  | COPS7B   | 2058   | EPRS     |
| 54841  | BIVM     | 1353   | COX11    | 2059   | EPS8     |
| 640    | BLK      | 9167   | COX7A2L  | 79574  | EPS8L3   |
| 649    | BMP1     | 1374   | CPT1A    | 2071   | ERCC3    |
| 652    | BMP4     | 8738   | CRADD    | 2073   | ERCC5    |
| 653    | BMP5     | 8804   | CREG1    | 157697 | ERICHI   |
| 118663 | BTBD16   | 1429   | CRYZ     | 2104   | ESRRG    |
| 694    | BTG1     | 8531   | CSDA     | 51466  | EVL      |
|        |          |        |          | 2135   | EXTL2    |
|        |          |        |          | 158584 | FAAH2    |
|        |          |        |          | 2171   | FABP5    |
|        |          |        |          | 2171   | FABP5    |
|        |          |        |          | 2172   | FABP6    |
|        |          |        |          | 51011  | FAHD2A   |
|        |          |        |          | 23017  | FAIM2    |
|        |          |        |          | 58489  | FAM108C1 |
|        |          |        |          | 285016 | FAM150B  |
|        |          |        |          | 9917   | FAM20B   |
|        |          |        |          | 64762  | FAM59A   |
|        |          |        |          | 157638 | FAM84B   |
|        |          |        |          | 147965 | FAM98C   |
|        |          |        |          | 26233  | FBXL6    |
|        |          |        |          | 23403  | FBXO46   |
|        |          |        |          | 84261  | FBXW9    |
|        |          |        |          | 2224   | FDP5     |
|        |          |        |          | 55612  | FERMT1   |
|        |          |        |          | 2242   | FES      |
|        |          |        |          | 152273 | FGD5     |
|        |          |        |          | 2248   | FGF3     |
|        |          |        |          | 2254   | FGF9     |
|        |          |        |          | 53834  | FGFRL1   |
|        |          |        |          | 85462  | FHDC1    |
|        |          |        |          | 84929  | FIBCD1   |
|        |          |        |          | 2318   | FLNC     |
|        |          |        |          | 23767  | FLRT3    |
|        |          |        |          | 114793 | FMNL2    |
|        |          |        |          | 2328   | FMO3     |
|        |          |        |          | 3171   | FOXA3    |
|        |          |        |          | 2303   | FOXC2    |
|        |          |        |          | 3344   | FOXN2    |
|        |          |        |          | 23401  | FRAT2    |
|        |          |        |          | 6624   | FSCN1    |
|        |          |        |          | 2526   | FUT4     |
|        |          |        |          | 2530   | FUT8     |
|        |          |        |          | 5349   | FXYD3    |
|        |          |        |          | 11211  | FZD10    |
|        |          |        |          | 51083  | GAL      |
|        |          |        |          | 9514   | GAL3ST1  |
|        |          |        |          | 2581   | GALC     |
|        |          |        |          | 50614  | GALNT9   |
|        |          |        |          | 374378 | GALNTL4  |
|        |          |        |          | 2621   | GAS6     |
|        |          |        |          | 2621   | GAS6     |
|        |          |        |          | 2632   | GBE1     |
|        |          |        |          | 9245   | GCNT3    |
|        |          |        |          | 79153  | GDPD3    |
|        |          |        |          | 79833  | GEMIN6   |
|        |          |        |          | 2697   | GJA1     |
|        |          |        |          | 2705   | GJB1     |
|        |          |        |          | 57165  | GJC2     |
|        |          |        |          | 23127  | GLT25D2  |
|        |          |        |          | 2781   | GNAZ     |
|        |          |        |          | 8443   | GNPAT    |
|        |          |        |          | 23015  | GOLGA8A  |
|        |          |        |          | 23015  | GOLGA8A  |
|        |          |        |          | 27333  | GOLIM4   |
|        |          |        |          | 55204  | GOLPH3L  |
|        |          |        |          | 55094  | GPATCH1  |
|        |          |        |          | 2852   | GPER     |
|        |          |        |          | 10243  | GPHN     |
|        |          |        |          | 221188 | GPR114   |
|        |          |        |          | 166647 | GPR125   |
|        |          |        |          | 2859   | GPR35    |
|        |          |        |          | 84059  | GPR98    |
|        |          |        |          | 2877   | GPX2     |
|        |          |        |          | 2918   | GRM8     |
|        |          |        |          | 2941   | GSTA4    |
|        |          |        |          | 373156 | GSTK1    |
|        |          |        |          | 119391 | GSTO2    |
|        |          |        |          | 9569   | GTF2IRD1 |
|        |          |        |          | 9569   | GTF2IRD1 |
|        |          |        |          | 2976   | GTF3C2   |
|        |          |        |          | 84705  | GTPBP3   |

|        |          |        |          |        |          |        |           |
|--------|----------|--------|----------|--------|----------|--------|-----------|
| 3033   | HADH     | 93273  | LEMD1    | 4684   | NCAM1    | 10419  | PRMT5     |
| 84264  | HAGHL    | 55214  | LEPREL1  | 54820  | NDE1     | 5629   | PROX1     |
| 84264  | HAGHL    | 25875  | LETMD1   | 4701   | NDUFA7   | 55615  | PRR5      |
| 3038   | HAS3     | 3955   | LFNG     | 81831  | NETO2    | 5638   | PRRG1     |
| 1839   | HBEGF    | 1939   | LGTN     | 4793   | NFKBIB   | 5645   | PRSS2     |
| 3049   | HBQ1     | 4008   | LMO7     | 152518 | NFXL1    | 84249  | PSD2      |
| 9759   | HDAC4    | 23266  | LPHN2    | 4815   | NINJ2    | 58155  | PTBP2     |
| 54497  | HEATR5B  | 9404   | LPXN     | 8508   | NIPSNAP1 | 55037  | PTCD3     |
| 50865  | HEBP1    | 78999  | LRFN4    | 85409  | NKD2     | 5728   | PTEN      |
| 388585 | HES5     | 26018  | LRIG1    | 1482   | NKX2-5   | 5730   | PTGDS     |
| 55502  | HES6     | 91355  | LRP5L    | 349565 | NMNAT3   | 5791   | PTPRE     |
| 28996  | HIPK2    | 10128  | LRPPRC   | 23530  | NNT      | 5799   | PTPRN2    |
| 28996  | HIPK2    | 9684   | LRRC14   | 28987  | NOB1     | 23369  | PUM2      |
| 80201  | HKDC1    | 51691  | LSM8     | 4862   | NPAS2    | 5828   | PXMP3     |
| 3134   | HLA-F    | 4048   | LTA4H    | 7181   | NR2C1    | 22841  | RAB11FIP2 |
| 3134   | HLA-F    | 1241   | LTB4R    | 7182   | NR2C2    | 55647  | RAB20     |
| 3131   | HLF      | 8425   | LTBP4    | 4929   | NR4A2    | 84932  | RAB2B     |
| 6927   | HNF1A    | 4060   | LUM      | 4923   | NTSR1    | 25782  | RAB3GAP2  |
| 3174   | HNF4G    | 57149  | LYRM1    | 83540  | NUF2     | 9910   | RABGAP1L  |
| 3178   | HNRNPA1  | 8216   | LZTR1    | 55746  | NUP133   | 5886   | RAD23A    |
| 9987   | HNRPDL   | 28992  | MACROD1  | 23225  | NUP210   | 10635  | RAD51AP1  |
| 9987   | HNRPDL   | 4094   | MAF      | 79991  | OBFC1    | 3843   | RANBP5    |
| 3189   | HNRPH3   | 10892  | MALT1    | 5016   | OVGP1    | 5910   | RAP1GDS1  |
| 84842  | HPDL     | 4121   | MAN1A1   | 5018   | OXA1L    | 5911   | RAP2A     |
| 51170  | HSD17B11 | 4124   | MAN2A1   | 5032   | P2RY11   | 51195  | RAPGEFL1  |
| 80270  | HSD3B7   | 4123   | MAN2C1   | 5034   | P4HB     | 5921   | RASA1     |
| 3312   | HSPA8    | 79694  | MANEA    | 8761   | PABPC4   | 166824 | RASSF6    |
| 3312   | HSPA8    | 256714 | MAP7D2   | 9182   | PAMCI    | 282996 | RBM20     |
| 5654   | HTRA1    | 7867   | MAPKAPK3 | 85315  | PAQR8    | 23029  | RBM34     |
| 3397   | IDI1     | 65108  | MARCKSL1 | 7849   | PAX8     | 27316  | RBMX      |
| 3476   | IGBP1    | 4144   | MAT2A    | 80714  | PBX4     | 27288  | RBMXL2    |
| 150084 | IGSF5    | 10150  | MBNL2    | 5092   | PCBD1    | 5955   | RCN2      |
| 55540  | IL17RB   | 129642 | MBOAT2   | 54039  | PCBP3    | 55758  | RCOR3     |
| 7850   | IL1R2    | 4157   | MC1R     | 5095   | PCCA     | 92241  | RCSDB     |
| 3556   | IL1RAP   | 57192  | MCOLN1   | 57526  | PCDH19   | 5973   | RENBP     |
| 53832  | IL20RA   | 79772  | MCTP1    | 51585  | PCF11    | 64864  | RFXDC2    |
| 53833  | IL20RB   | 4233   | MET      | 55795  | PCID2    | 93587  | RG9MTD2   |
| 3576   | IL8      | 25840  | METTL7A  | 55251  | PCMTD2   | 56963  | RGMA      |
| 83943  | IMMP2L   | 51108  | METTL9   | 84306  | PDCD2L   | 8786   | RGS11     |
| 3613   | IMPA2    | 4242   | MFNG     | 5138   | PDE2A    | 6004   | RGS16     |
| 3615   | IMPDH2   | 4248   | MGAT3    | 8622   | PDE8B    | 9028   | RHBDL1    |
| 3625   | INHBB    | 4255   | MGMT     | 118987 | PDZD8    | 23504  | RIMBP2    |
| 83729  | INHBE    | 4257   | MGST1    | 57162  | PELI1    | 9610   | RIN1      |
| 3635   | INPP5D   | 4258   | MGST2    | 5184   | PEPD     | 114804 | RNF157    |
| 124152 | IQCK     | 142678 | MIB2     | 8864   | PER2     | 388591 | RNF207    |
| 8660   | IRS2     | 57708  | MIER1    | 25796  | PGLS     | 6092   | ROBO2     |
| 153572 | IRX2     | 4282   | MIF      | 11331  | PHB2     | 9475   | ROCK2     |
| 3688   | ITGB1    | 145282 | MIPOL1   | 22822  | PHLDA1   | 22934  | RPIA      |
| 3688   | ITGB1    | 407975 | MIRH1    | 84457  | PHYHIPL  | 4736   | RPL10A    |
| 3691   | ITGB4    | 8195   | MKKS     | 10464  | PIBF1    | 6137   | RPL13     |
| 3695   | ITGB7    | 23609  | MKRN2    | 8544   | PIR      | 23521  | RPL13A    |
| 182    | JAG1     | 64757  | MOSC1    | 51365  | PLA1A    | 23521  | RPL13A    |
| 3714   | JAG2     | 9585   | MPHOSPH1 | 59338  | PLEKHA1  | 9045   | RPL14     |
| 56704  | JPH1     | 64981  | MRPL34   | 22874  | PLEKHA6  | 6141   | RPL18     |
| 131096 | KCNH8    | 84311  | MRPL45   | 25894  | PLEKHG4  | 6142   | RPL18A    |
| 3759   | KCNJ2    | 84311  | MRPL45   | 5352   | PLOD2    | 6142   | RPL18A    |
| 3790   | KCNS3    | 65005  | MRPL9    | 5408   | PNLIPRP2 | 6146   | RPL22     |
| 57582  | KCNT1    | 60488  | MRPS35   | 29944  | PNMA3    | 6147   | RPL23A    |
| 55605  | KIF21A   | 10232  | MSLN     | 84968  | PNMA6A   | 6157   | RPL27A    |
| 22920  | KIFAP3   | 4488   | MSX2     | 5409   | PNMT     | 6158   | RPL28     |
| 9365   | KL       | 10797  | MTHFD2   | 5411   | PNN      | 6164   | RPL34     |
| 10365  | KLF2     | 441024 | MTHFD2L  | 10908  | PNPLA6   | 25873  | RPL36     |
| 688    | KLF5     | 56667  | MUC13    | 55703  | POLR3B   | 25873  | RPL36     |
| 11012  | KLK11    | 118430 | MUCL1    | 5454   | POU3F2   | 6166   | RPL36AL   |
| 3821   | KLRC1    | 139221 | MUM1L1   | 5468   | PPARG    | 6129   | RPL7      |
| 10219  | KLRG1    | 4084   | MXD1     | 10450  | PPIE     | 85495  | RPPH1     |
| 22914  | KLRK1    | 4602   | MYB      | 5500   | PPP1CB   | 6206   | RPS12     |
| 3872   | KRT17    | 23077  | MYCBP2   | 84152  | PPP1R1B  | 6187   | RPS2      |
| 56983  | KTELC1   | 57644  | MYH7B    | 90673  | PPP1R3E  | 6228   | RPS23     |
| 3914   | LAMB3    | 25924  | MYRIP    | 5522   | PPP2R2C  | 6228   | RPS23     |
| 10319  | LAMC3    | 4661   | MYT1     | 639    | PRDM1    | 6232   | RPS27     |
| 51056  | LAP3     | 4664   | NAB1     | 56978  | PRDM8    | 6232   | RPS27     |
| 253782 | LASS6    | 4673   | NAP1L1   | 10113  | PREB     | 6235   | RPS29     |
| 3930   | LBR      | 4677   | NARS     | 5553   | PRG2     | 6189   | RPS3A     |
| 286256 | LCN12    | 4678   | NASP     | 5578   | PRKCA    | 6189   | RPS3A     |

|        |          |        |         |        |          |        |         |
|--------|----------|--------|---------|--------|----------|--------|---------|
| 6189   | RPS3A    | 79677  | SMC6    | 26277  | TINF2    | 337867 | UBAC2   |
| 54665  | RSBN1    | 54471  | SMCR7L  | 80213  | TM2D3    | 7325   | UBE2E2  |
| 861    | RUNX1    | 64094  | SMOC2   | 51768  | TM7SF3   | 56893  | UBQLN4  |
| 864    | RUNX3    | 56950  | SMYD2   | 9375   | TM9SF2   | 51506  | UFC1    |
| 57402  | S100A14  | 56950  | SMYD2   | 79905  | TMC7     | 55757  | UGCGL2  |
| 140576 | S100A16  | 64754  | SMYD3   | 55002  | TMCO3    | 65110  | UPF3A   |
| 6286   | S100P    | 27044  | SND1    | 11018  | TMED1    | 65110  | UPF3A   |
| 148418 | SAMD13   | 6641   | SNTB1   | 83935  | TMEM133  | 7385   | UQCRC2  |
| 25813  | SAMM50   | 8435   | SOAT2   | 55260  | TMEM143  | 7386   | UQCRFS1 |
| 54938  | SARS2    | 6653   | SORL1   | 25907  | TMEM158  | 7388   | UQCRH   |
| 9522   | SCAMP1   | 25928  | SOSTDC1 | 81615  | TMEM163  | 7392   | USF2    |
| 51097  | SCCPDH   | 6659   | SOX4    | 55365  | TMEM176A | 10083  | USH1C   |
| 10371  | SEMA3A   | 10290  | SOX4    | 129787 | TMEM18   | 8615   | USO1    |
| 6405   | SEMA3F   | 56848  | SPHK2   | 55161  | TMEM33   | 7417   | VDAC2   |
| 26135  | SERPBP1  | 139886 | SPIN4   | 79188  | TMEM43   | 9686   | VGLL4   |
| 1992   | SERPINB1 | 84501  | SPIRE2  | 83604  | TMEM47   | 7428   | VHL     |
| 5268   | SERPINB5 | 6693   | SPN     | 128338 | TMEM77   | 7429   | VIL1    |
| 5274   | SERPINI1 | 201305 | SPNS3   | 64699  | TMPRSS3  | 51160  | VPS28   |
| 2810   | SFN      | 10252  | SPRY1   | 56649  | TMPRSS4  | 51028  | VPS36   |
| 10147  | SFRS14   | 10253  | SPRY2   | 84899  | TMTC4    | 7447   | VSNL1   |
| 25957  | SFRS18   | 23635  | SSBP2   | 8764   | TNFRSF14 | 23559  | WBP1    |
| 6432   | SFRS7    | 29101  | SSU72   | 8718   | TNFRSF25 | 84219  | WDR24   |
| 9047   | SH2D2A   | 6767   | ST13    | 23043  | TNIK     | 253769 | WDR27   |
| 9644   | SH3PXD2A | 6767   | ST13    | 10188  | TNK2     | 55339  | WDR33   |
| 54436  | SH3TC1   | 6767   | ST13    | 9804   | TOMM20   | 55255  | WDR41   |
| 26751  | SH3YL1   | 7982   | ST7     | 56993  | TOMM22   | 10238  | WDR68   |
| 23309  | SIN3B    | 10809  | STARD10 | 9868   | TOMM70A  | 256764 | WDR72   |
| 8631   | SKAP1    | 6788   | STK3    | 7155   | TOP2B    | 7456   | WIPF1   |
| 6502   | SKP2     | 23012  | STK38L  | 27324  | TOX3     | 65125  | WNK1    |
| 122060 | SLAIN1   | 29091  | STXBP6  | 27010  | TPK1     | 7476   | WNT7A   |
| 84068  | SLC10A7  | 55959  | SULF2   | 80305  | TRABD    | 56949  | XAB2    |
| 6558   | SLC12A2  | 10388  | SYCP2   | 7188   | TRAF5    | 7494   | XBP1    |
| 117247 | SLC16A10 | 6857   | SYT1    | 28951  | TRIB2    | 7504   | XK      |
| 6510   | SLC1A5   | 90019  | SYT8    | 89870  | TRIM15   | 55432  | YOD1    |
| 65010  | SLC26A6  | 9014   | TAF1B   | 89870  | TRIM15   | 284273 | ZADH2   |
| 10998  | SLC27A5  | 6894   | TARBP1  | 8805   | TRIM24   | 201501 | ZBTB7C  |
| 7781   | SLC30A3  | 6905   | TBCE    | 51592  | TRIM33   | 84524  | ZC3H8   |
| 340146 | SLC35D3  | 6996   | TDG     | 114088 | TRIM9    | 11244  | ZHX1    |
| 54407  | SLC38A2  | 54997  | TESC    | 11078  | TRIOBP   | 10781  | ZNF266  |
| 57181  | SLC39A10 | 7027   | TFDP1   | 55503  | TRPV6    | 84449  | ZNF333  |
| 283375 | SLC39A5  | 7032   | TFF2    | 203062 | TSNARE1  | 57541  | ZNF398  |
| 126969 | SLC44A3  | 7033   | TFF3    | 7102   | TSPAN7   | 22847  | ZNF507  |
| 85414  | SLC45A3  | 23483  | TGDS    | 7103   | TSPAN8   | 84450  | ZNF512  |
| 8884   | SLC5A6   | 7039   | TGFA    | 706    | TSPO     | 126231 | ZNF573  |
| 6545   | SLC7A4   | 7049   | TGFBR3  | 7267   | TTC3     | 51545  | ZNF581  |
| 28231  | SLCO4A1  | 7051   | TGM1    | 23170  | TLL12    | 55657  | ZNF692  |
| 133482 | SLCO6A1  | 9333   | TGM5    | 79861  | TUBAL3   | 57116  | ZNF695  |
| 6590   | SLPI     | 79896  | THNSL1  | 10426  | TUBGCP3  | 7552   | ZNF711  |
| 6597   | SMARCA4  | 80745  | THUMPD2 | 286319 | TUSC1    | 57643  | ZSWIM5  |
| 6598   | SMARCB1  | 26520  | TIMM9   | 55236  | UBA6     |        |         |

Supplemental Table 3: The following Gene Ontology categories are over-represented in the list of genes that show at least a two-fold increase in expression in the shHD3 cell line compared to the shCNTL cell line.

| <b>Genes Up-regulated by shHD3</b> |       |           |                                                |
|------------------------------------|-------|-----------|------------------------------------------------|
| Count                              | Total | OddsRatio | Term                                           |
| 113                                | 2315  | 1.46      | Cellular component organization and biogenesis |
| 83                                 | 1840  | 1.39      | Developmental process                          |
| 80                                 | 1535  | 1.54      | Cell differentiation                           |
| 72                                 | 1486  | 1.40      | System development                             |
| 53                                 | 965   | 1.60      | Negative regulation of cellular process        |
| 42                                 | 770   | 1.60      | Anatomical structure morphogenesis             |
| 41                                 | 719   | 1.65      | Cell death                                     |
| 39                                 | 671   | 1.68      | Apoptosis                                      |
| 29                                 | 348   | 2.49      | Localization of cell                           |
| 27                                 | 399   | 1.97      | Cell morphogenesis                             |
| 27                                 | 458   | 1.69      | Regulation of programmed cell death            |
| 24                                 | 364   | 1.91      | Intracellular protein transport                |
| 19                                 | 205   | 2.76      | Cell migration                                 |
| 18                                 | 268   | 1.93      | Protein complex assembly                       |
| 17                                 | 227   | 2.18      | Embryonic development                          |
| 16                                 | 206   | 2.26      | Skeletal development                           |
| 15                                 | 181   | 2.43      | Actin cytoskeleton organization and biogenesis |
| 15                                 | 197   | 2.21      | Negative regulation of apoptosis               |
| 12                                 | 144   | 2.43      | Anatomical structure formation                 |

Supplemental Table 4: The following Gene Ontology categories are over-represented in the list of genes that show at least a two-fold decrease in expression in the shHD3 cell line compared to the shCNTL cell line.

| <b>Genes Up-regulated by shHD3</b> |      |           |                                          |
|------------------------------------|------|-----------|------------------------------------------|
| Count                              | Size | OddsRatio | Term                                     |
| 201                                | 6203 | 1.34      | Metabolic process                        |
| 112                                | 2925 | 1.36      | Protein metabolic process                |
| 109                                | 2782 | 1.40      | Cellular macromolecule metabolic process |
| 60                                 | 1181 | 1.81      | Biosynthetic process                     |
| 25                                 | 358  | 2.50      | Translation                              |
| 23                                 | 400  | 1.98      | Regulation of cell proliferation         |
| 9                                  | 114  | 2.74      | Protein amino acid glycosylation         |
